# Supplementary material for: On-demand removable hydrogels based on photolabile cross-linkings as wound dressing materials
Source: Royal Society of Chemistry journal article supplement (doi:10.1039/c9tb01544b), 2019-01-01
Supplement: c9tb01544b1.pdf [file c9tb01544b1.pdf]

## Supplementary Information

### **On-demand removable hydrogels based on photolabile cross-linkings as wound dressing materials**

Haiyang Wu,<sup>a,b,c</sup> Zezhao Qin,<sup>a,b,c</sup> Xiaofeng Yu,<sup>a,c</sup> Jinge Li,<sup>a,c</sup> Hongying Lv,<sup>\*a,c</sup> and Xiaoni Yang<sup>\*a,c</sup>

*<sup>a</sup>State Key Laboratory of Polymer Physics and Chemistry, Changchun Institute of Applied Chemistry, Chinese Academy of Sciences, 5625 Renmin Street, Changchun 130022, P.R. China.*

*<sup>b</sup>College of Applied Chemistry and Engineering, University of Science and Technology of China, Jinzhai Road No 96, Hefei 230026, P. R. China.*

*<sup>c</sup>Polymer Composite Engineering Laboratory, Changchun Institute of Applied Chemistry, Chinese Academy of Sciences, 5625 Renmin Street, Changchun 130022, P.R. China.*

*\*To whom correspondence should be addressed. E-mail address: [xnyang@ciac.ac.cn](mailto:xnyang@ciac.ac.cn), [hongyinglv@ciac.ac.cn](mailto:hongyinglv@ciac.ac.cn).*

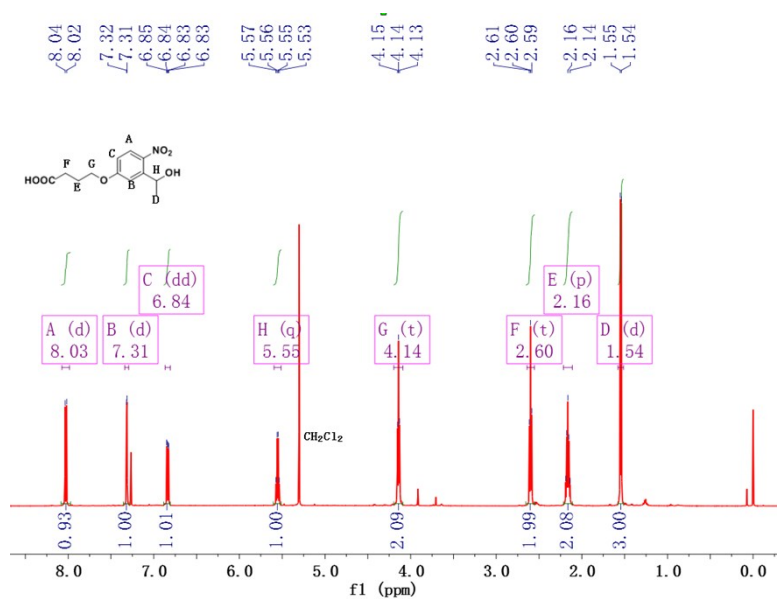

Fig. S1 <sup>1</sup>H NMR spectrum of HNB.

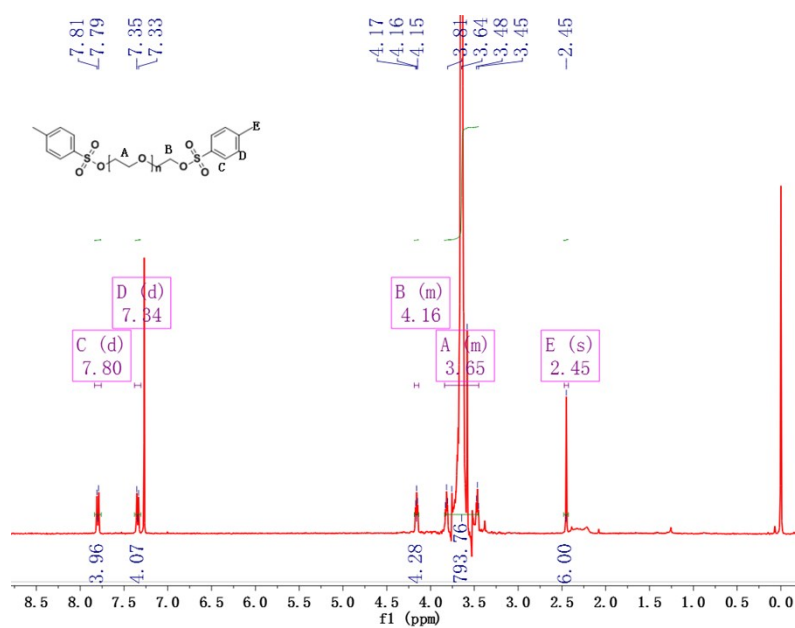

Fig. S2 <sup>1</sup>H NMR spectrum of TsO-PEG-OTs.

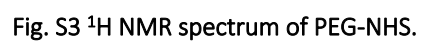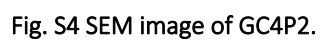

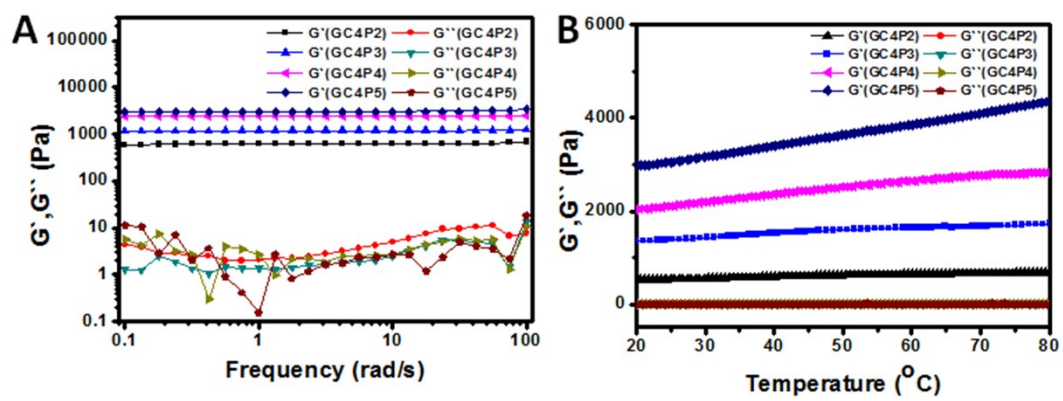

Fig. S5 (A) Frequency sweeps and (B) temperature sweeps of four hydrogels.
